# Supplementary material for: Discovery of reactive chlorine, sulphur and nitrogen containing ambient volatile organic compounds in the megacity of Delhi during both clean and extremely polluted seasons
Source: Copernicus journal article supplement (doi:10.5194/egusphere-2024-500), 2024-02-29

## Discovery of reactive chlorine, sulphur and nitrogen containing ambient volatile organic compounds in the megacity of Delhi during both clean and extremely polluted seasons

Sachin Mishra<sup>1</sup>, Vinayak Sinha<sup>1</sup>, Haseeb Hakkim<sup>1</sup>, Arpit Awasthi<sup>1</sup>, Sachin D. Ghude<sup>2</sup>, Vijay Kumar Soni<sup>3</sup>, Narendra Nigam<sup>3</sup>, Baerbel Sinha<sup>1</sup>, Madhavan N. Rajeevan<sup>4</sup>

<sup>1</sup>Department of Earth and Environmental Sciences, Indian Institute of Science Education and Research Mohali, Sector 81, S.A.S Nagar, Manauli PO, Punjab, 140306, India

<sup>2</sup>Indian Institute of Tropical Meteorology, Pashan, Pune 411 008, Ministry of Earth Sciences, India

<sup>3</sup>India Meteorological Department, New Delhi 110 003, Ministry of Earth Sciences, India

<sup>4</sup>Ministry of Earth Sciences, Government of India, New Delhi 110 003, India

\* Correspondence to: Vinayak Sinha ([vsinha@iisermohali.ac.in](mailto:vsinha@iisermohali.ac.in))

Table S1: Operational settings for PTR-TOF-MS 10 K parameters used during this deployment

| Parameters                                       | Values     |
|--------------------------------------------------|------------|
| Overall drift voltage ( $U_{\text{drift}}$ )     | 600 V      |
| Temperature at drift tube ( $T_{\text{drift}}$ ) | 120 °C     |
| Pressure at drift tube ( $P_{\text{drift}}$ )    | 3.0 mbar   |
| Length of the drift tube ( $L_{\text{drift}}$ )  | 9.2 cm     |
| Extraction time (t)                              | 26 $\mu$ s |
| Field strength of the drift tube (E/N)           | 120 Td     |

\*  $E$  is the electric field strength ( $\text{V cm}^{-1}$ ) and  $N$  is the gas number density ( $\text{molecule cm}^{-3}$ ).  $1 \text{ Td} = 10^{-17} \text{ V cm}^2 \text{ molecule}^{-1}$

Table S2: The table lists 111 identified organic species, including the protonated m/z, molecular formula, names of probable compounds, the structure of a potential contributor (many others structural possibilities maybe feasible), along with the average mixing ratios (ppb) observed during the monsoon (July-Sep 2022) and post-monsoon (Oct-Nov 2022) seasons. Also provided are each compound's Interquartile Range (IQR), and diel emission profile indicative of whether its ambient levels are driven by primary emissions, photochemical formation/ biogenic/ evaporative or both.

| Sr No. | Type             | Protonated m/z | Molecular formula                 | Major Potential contributors                            | Structure of a potential contributor                                                 | Average [Monsoon] (ppb) IQR | Average [post-monsoon] (ppb) IQR | Diurnal characteristics                                                                                               |
|--------|------------------|----------------|-----------------------------------|---------------------------------------------------------|--------------------------------------------------------------------------------------|-----------------------------|----------------------------------|-----------------------------------------------------------------------------------------------------------------------|
| 1      | Pure Hydrocarbon | 41.035         | <b>C<sub>3</sub>H<sub>4</sub></b> | Propyne                                                 |    | 3.043 (1.841)               | 9.997 (7.96)                     | Unimodal pattern with the evening peak                                                                                |
| 2      |                  | 43.051         | <b>C<sub>3</sub>H<sub>6</sub></b> | Propene                                                 |    | 1.88 (1.21)                 | 4.965 (3.986)                    | Bimodal pattern with morning and evening peaks                                                                        |
| 3      |                  | 53.035         | <b>C<sub>4</sub>H<sub>4</sub></b> | Vinylacetylene, 1-Buten-3-yne                           |   | 0.081 (0.055)               | 0.722 (0.778)                    | Bimodal pattern with morning and evening peaks                                                                        |
| 4      |                  | 55.051         | <b>C<sub>4</sub>H<sub>6</sub></b> | 1,2-Butadiene, 1-Butyne, 2-Butyne 1,3 Butadiene         |  | 1.067 (0.555)               | 2.78 (1.913)                     | Bimodal pattern with morning and evening peaks                                                                        |
| 5      |                  | 57.067         | <b>C<sub>4</sub>H<sub>8</sub></b> | Methyl tert-butyl ether (MTBE) fragment / 1-Butene      |  | 1.813 (1.089)               | 5.578 (4.581)                    | Bimodal pattern with morning and evening peaks                                                                        |
| 6      |                  | 67.051         | <b>C<sub>5</sub>H<sub>6</sub></b> | Cyclopentadiene, monoterpene fragment, butanol fragment |  | 0.172 (0.108)               | 0.497 (0.336)                    | Bimodal pattern with afternoon and evening peaks                                                                      |
| 7      |                  | 69.067         | <b>C<sub>5</sub>H<sub>8</sub></b> | Isoprene + 2-methyl-3-butene-2-ol fragment              |  | 0.667 (0.582)               | 1.118 (0.949)                    | Unimodal pattern with afternoon peak in monsoon while bimodal pattern with afternoon and evening peak in post-monsoon |
| 8      |                  | 79.052         | <b>C<sub>6</sub>H<sub>6</sub></b> | Benzene                                                 |  | 0.802 (0.633)               | 3.724 (3.77)                     | Bimodal pattern with morning and evening peaks                                                                        |

|    |         |                                    |                                                           |                                                                                      |                  |                   |                                                           |
|----|---------|------------------------------------|-----------------------------------------------------------|--------------------------------------------------------------------------------------|------------------|-------------------|-----------------------------------------------------------|
| 9  | 83.084  | <b>C<sub>6</sub>H<sub>10</sub></b> | Cyclohexene,<br>Hexyne<br>isomers                         | 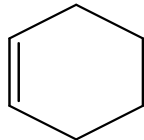   | 0.319<br>(0.169) | 0.624<br>(0.474)  | Bimodal pattern<br>with afternoon<br>and evening<br>peaks |
| 10 | 85.099  | <b>C<sub>6</sub>H<sub>12</sub></b> | Cyclohexane,<br>Hexene                                    |    | 0.058<br>(0.036) | 0.16<br>(0.134)   | Bimodal pattern<br>with morning<br>and evening<br>peaks   |
| 11 | 91.053  | <b>C<sub>7</sub>H<sub>6</sub></b>  | Monoterpene<br>Fragment                                   |                                                                                      | 0.102<br>(0.077) | 0.714<br>(0.745)  | Bimodal pattern<br>with morning<br>and evening<br>peaks   |
| 12 | 93.069  | <b>C<sub>7</sub>H<sub>8</sub></b>  | Toluene                                                   |    | 2.148<br>(1.813) | 9.372<br>(10.377) | Bimodal pattern<br>with morning<br>and evening<br>peaks   |
| 13 | 95.084  | <b>C<sub>7</sub>H<sub>10</sub></b> | Monoterpene<br>Fragment                                   |                                                                                      | 0.103<br>(0.057) | 0.404<br>(0.293)  | Bimodal pattern<br>with morning<br>and evening<br>peaks   |
| 14 | 97.1    | <b>C<sub>7</sub>H<sub>12</sub></b> | Cycloheptene,<br>Alkyl fragment                           |   | 0.1<br>(0.058)   | 0.272<br>(0.217)  | Bimodal pattern<br>with afternoon<br>and evening<br>peaks |
| 15 | 99.116  | <b>C<sub>7</sub>H<sub>14</sub></b> | Methylcyclohe<br>xane, Heptene<br>& other<br>hydrocarbons |  | 0.005<br>(0.003) | 0.014<br>(0.01)   | Bimodal pattern<br>with afternoon<br>and evening<br>peaks |
| 16 | 105.069 | <b>C<sub>8</sub>H<sub>8</sub></b>  | Styrene                                                   |  | 0.167<br>(0.104) | 0.699<br>(0.684)  | Bimodal pattern<br>with morning<br>and evening<br>peaks   |
| 17 | 107.085 | <b>C<sub>8</sub>H<sub>10</sub></b> | Sum of C8-<br>Aromatics                                   |  | 1.123<br>(1.025) | 5.017<br>(5.247)  | Bimodal pattern<br>with morning<br>and evening<br>peaks   |
| 18 | 109.1   | <b>C<sub>8</sub>H<sub>12</sub></b> | Terpene<br>fragment/Cyclo<br>octadiene                    |  | 0.064<br>(0.032) | 0.205<br>(0.174)  | Bimodal pattern<br>with afternoon<br>and evening<br>peaks |
| 19 | 111.116 | <b>C<sub>8</sub>H<sub>14</sub></b> | Ethenyl<br>cyclohexane                                    |  | 0.062<br>(0.035) | 0.159<br>(0.137)  | Bimodal pattern<br>with afternoon<br>and evening<br>peaks |
| 20 | 119.085 | <b>C<sub>9</sub>H<sub>10</sub></b> | Terpene<br>fragment                                       |                                                                                      | 0.063<br>(0.04)  | 0.233<br>(0.214)  | Bimodal pattern<br>with afternoon<br>and evening<br>peaks |

|    |         |                                     |                                                            |                                                                                     |                  |                  |                                                  |
|----|---------|-------------------------------------|------------------------------------------------------------|-------------------------------------------------------------------------------------|------------------|------------------|--------------------------------------------------|
| 21 | 121.101 | <b>C<sub>9</sub>H<sub>12</sub></b>  | Sum of C-9 aromatics                                       | 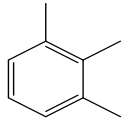   | 0.483<br>(0.449) | 2.267<br>(2.323) | Bimodal pattern with morning and evening peaks   |
| 22 | 123.116 | <b>C<sub>9</sub>H<sub>14</sub></b>  | Santene, 1,3-Cyclopentadiene & other hydrocarbons          |    | 0.039<br>(0.019) | 0.123<br>(0.11)  | Bimodal pattern with afternoon and evening peaks |
| 23 | 125.133 | <b>C<sub>9</sub>H<sub>16</sub></b>  | Nonyne, non-1,8-diene                                      |    | 0.021<br>(0.011) | 0.049<br>(0.043) | Bimodal pattern with afternoon and evening peaks |
| 24 | 129.07  | <b>C<sub>10</sub>H<sub>8</sub></b>  | Naphthalene                                                |    | 0.09 (0.052)     | 0.381<br>(0.343) | Bimodal pattern with morning and evening peaks   |
| 25 | 133.102 | <b>C<sub>10</sub>H<sub>12</sub></b> | Ethyl styrene, tetrahydronaphthalene                       |    | 0.044<br>(0.028) | 0.154<br>(0.134) | Bimodal pattern with morning and evening peaks   |
| 26 | 135.118 | <b>C<sub>10</sub>H<sub>14</sub></b> | P-cymene, C4-substituted benzene, C2-substituted xylene    |    | 0.182<br>(0.153) | 0.912<br>(0.87)  | Bimodal pattern with morning and evening peaks   |
| 27 | 137.133 | <b>C<sub>10</sub>H<sub>16</sub></b> | Sum of Monoterpenes (MT)                                   |  | 0.172<br>(0.108) | 0.497<br>(0.336) | Bimodal pattern with morning and evening peaks   |
| 28 | 143.086 | <b>C<sub>11</sub>H<sub>10</sub></b> | Methyl naphthalene                                         |  | 0.014<br>(0.009) | 0.063<br>(0.059) | Bimodal pattern with morning and evening peaks   |
| 29 | 145.102 | <b>C<sub>11</sub>H<sub>12</sub></b> | C2 substituted indene                                      |  | 0.007<br>(0.004) | 0.017<br>(0.016) | Trimodal pattern                                 |
| 30 | 147.118 | <b>C<sub>11</sub>H<sub>14</sub></b> | Cyclopentylbenzene & other hydrocarbons                    |  | 0.035<br>(0.022) | 0.086<br>(0.079) | Trimodal pattern                                 |
| 31 | 157.099 | <b>C<sub>12</sub>H<sub>12</sub></b> | C2-substituted naphthalene                                 |  | 0.014<br>(0.006) | 0.039<br>(0.032) | Bimodal pattern with afternoon and evening peaks |
| 32 | 161.134 | <b>C<sub>12</sub>H<sub>16</sub></b> | Cyclohexylbenzene, butyl styrene, cyclopentylmethylbenzene |  | 0.015<br>(0.009) | 0.042<br>(0.038) | Trimodal pattern                                 |

|    |                 |         |                                     |                                                             |                                                                                      |                  |                    |                                                  |
|----|-----------------|---------|-------------------------------------|-------------------------------------------------------------|--------------------------------------------------------------------------------------|------------------|--------------------|--------------------------------------------------|
| 33 |                 | 175.15  | <b>C<sub>13</sub>H<sub>18</sub></b> | 1,1,6-Trimethyltetralin/ ionene                             | 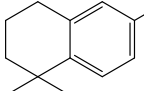   | 0.006<br>(0.004) | 0.022<br>(0.021)   | Trimodal pattern                                 |
| 34 |                 | 177.165 | <b>C<sub>13</sub>H<sub>20</sub></b> | C7-substituted benzene,                                     |     | 0.011<br>(0.006) | 0.03<br>(0.028)    | Trimodal pattern                                 |
| 35 |                 | 179.181 | <b>C<sub>13</sub>H<sub>22</sub></b> | C3-substituted adamantane                                   |     | 0.004<br>(0.003) | 0.015<br>(0.014)   | Trimodal pattern                                 |
| 36 |                 | 183.121 | <b>C<sub>14</sub>H<sub>14</sub></b> | Bibenzyl                                                    |    | 0.003<br>(0.002) | 0.006<br>(0.004)   | Unimodal pattern with afternoon peak             |
| 37 |                 | 187.148 | <b>C<sub>14</sub>H<sub>18</sub></b> | C4-substituted dihydroazulene, benzyl cycloheptene          |    | 0.004<br>(0.002) | 0.008<br>(0.006)   | Unimodal pattern with afternoon peak             |
| 38 |                 | 189.165 | <b>C<sub>14</sub>H<sub>20</sub></b> | C4-substituted dihydronaphthalene, cyclopentylpropylbenzene |  | 0.004<br>(0.003) | 0.012<br>(0.011)   | Trimodal pattern                                 |
| 39 |                 | 191.181 | <b>C<sub>14</sub>H<sub>22</sub></b> | C8-substituted benzene                                      |   | 0.005<br>(0.004) | 0.015<br>(0.014)   | Trimodal pattern                                 |
| 40 |                 | 217.195 | <b>C<sub>16</sub>H<sub>24</sub></b> | C6-substituted dihydronaphthalene                           |  | 0.002<br>(0.001) | 0.005<br>(0.004)   | Trimodal pattern                                 |
| 41 |                 | 233.228 | <b>C<sub>17</sub>H<sub>28</sub></b> | C11-substituted benzene                                     |   | 0.002<br>(0.001) | 0.004<br>(0.003)   | Bimodal pattern with afternoon and evening peaks |
| 42 |                 | 247.243 | <b>C<sub>18</sub>H<sub>30</sub></b> | C12-substituted benzene                                     |   | 0.002<br>(0.002) | 0.003<br>(0.002)   | Unimodal pattern with afternoon peak             |
| 43 | OXYGENATED VOCS | 31.014  | CH <sub>2</sub> O                   | Formaldehyde                                                |   | 0.359<br>(0.233) | 1.706<br>(1.247)   | Bimodal pattern with afternoon and evening peaks |
| 44 |                 | 33.03   | CH <sub>4</sub> O                   | Methanol                                                    |   | 9.854<br>(4.928) | 19.919<br>(13.845) | Bimodal pattern with monsoon                     |

|    |        |                                                |                                              |                                                                                     |                  |                   |  |                                                  |
|----|--------|------------------------------------------------|----------------------------------------------|-------------------------------------------------------------------------------------|------------------|-------------------|--|--------------------------------------------------|
|    |        |                                                |                                              |                                                                                     |                  |                   |  | and evening peaks                                |
| 45 | 45.03  | <b>C<sub>2</sub>H<sub>4</sub>O</b>             | Acetaldehyde                                 | 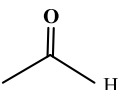   | 3.339<br>(1.866) | 7.755<br>(5.799)  |  | Bimodal pattern with afternoon and evening peaks |
| 46 | 47.009 | <b>CH<sub>2</sub>O<sub>2</sub></b>             | Formic acid                                  |    | 0.716<br>(0.568) | 1.32<br>(1.095)   |  | Unimodal pattern with afternoon peak             |
| 47 | 47.046 | <b>C<sub>2</sub>H<sub>6</sub>O</b>             | Ethanol                                      |    | 0.212<br>(0.16)  | 0.55<br>(0.505)   |  | Bimodal pattern with morning and evening peaks   |
| 48 | 57.03  | <b>C<sub>3</sub>H<sub>4</sub>O</b>             | Acrolein                                     |    | 0.157<br>(0.096) | 0.674<br>(0.598)  |  | Bimodal pattern with morning and evening peaks   |
| 49 | 59.046 | <b>C<sub>3</sub>H<sub>6</sub>O</b>             | Acetone + Propanal                           |    | 3.647<br>(2.162) | 10.593<br>(8.481) |  | Bimodal pattern with afternoon and evening peaks |
| 50 | 61.025 | <b>C<sub>2</sub>H<sub>4</sub>O<sub>2</sub></b> | Acetic acid+ Glycolaldehyde                  |    | 4.103<br>(3.342) | 10.975<br>(8.781) |  | Trimodal pattern                                 |
| 51 | 69.031 | <b>C<sub>4</sub>H<sub>4</sub>O</b>             | Furan                                        |  | 0.032<br>(0.019) | 0.168<br>(0.135)  |  | Bimodal pattern with morning and evening peaks   |
| 52 | 71.047 | <b>C<sub>4</sub>H<sub>6</sub>O</b>             | Methyl Vinyl Ketone, Methacrolein, 2-Butenal |  | 0.291<br>(0.189) | 0.498<br>(0.419)  |  | Bimodal pattern with morning and evening peaks   |
| 53 | 73.026 | <b>C<sub>3</sub>H<sub>4</sub>O<sub>2</sub></b> | Methyl glyoxal                               |  | 0.161<br>(0.109) | 0.261<br>(0.259)  |  | Unimodal pattern with afternoon peak             |
| 54 | 73.062 | <b>C<sub>4</sub>H<sub>8</sub>O</b>             | Butanal, 2-Butanone, MEK                     |  | 0.555<br>(0.388) | 1.418<br>(1.195)  |  | Bimodal pattern with morning and evening peaks   |
| 55 | 75.042 | <b>C<sub>3</sub>H<sub>6</sub>O<sub>2</sub></b> | Hydroxyacetone                               |  | 0.278<br>(0.143) | 1.012<br>(0.848)  |  | Bimodal pattern with morning and evening peaks   |
| 56 | 81.031 | <b>C<sub>5</sub>H<sub>4</sub>O</b>             | 2,4-Cyclopentadiene-1-one                    |  | 0.014<br>(0.007) | 0.06<br>(0.055)   |  | Bimodal pattern with morning and evening peaks   |
| 57 | 83.047 | <b>C<sub>5</sub>H<sub>6</sub>O</b>             | 2-Methyl furan                               |  | 0.05<br>(0.026)  | 0.205<br>(0.157)  |  | Bimodal pattern with morning and evening peaks   |
| 58 | 85.027 | <b>C<sub>4</sub>H<sub>4</sub>O<sub>2</sub></b> | 2-Furanone / butenedial                      |                                                                                     | 0.05<br>(0.034)  | 0.275<br>(0.213)  |  | Bimodal pattern with afternoon                   |

|    |         |                                                |                                                               |                                                                                      |                                                                                   |                  |                                                                                                  |                   |
|----|---------|------------------------------------------------|---------------------------------------------------------------|--------------------------------------------------------------------------------------|-----------------------------------------------------------------------------------|------------------|--------------------------------------------------------------------------------------------------|-------------------|
|    |         |                                                |                                                               |                                                                                      | 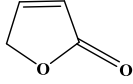 |                  |                                                                                                  | and evening peaks |
| 59 | 85.063  | <b>C<sub>5</sub>H<sub>8</sub>O</b>             | Cyclopentanone                                                |     | 0.06<br>(0.03)                                                                    | 0.167<br>(0.132) | Bimodal pattern with afternoon and evening peaks                                                 |                   |
| 60 | 87.043  | <b>C<sub>4</sub>H<sub>6</sub>O<sub>2</sub></b> | 2,3 butanedione/<br>biacetyl                                  |     | 0.175<br>(0.094)                                                                  | 0.566<br>(0.465) | Bimodal pattern with afternoon and evening peaks                                                 |                   |
| 61 | 87.079  | <b>C<sub>5</sub>H<sub>10</sub>O</b>            | 2-Pentanone,<br>2-methyl-3-butene-2-ol,<br>Pentanal           |     | 0.052<br>(0.031)                                                                  | 0.141<br>(0.132) | Bimodal pattern with afternoon and evening peaks                                                 |                   |
| 62 | 89.058  | <b>C<sub>4</sub>H<sub>8</sub>O<sub>2</sub></b> | Butanoic acid,<br>Ethyl acetate                               |     | 0.281<br>(0.234)                                                                  | 0.533<br>(0.449) | Bimodal pattern with morning and afternoon peaks                                                 |                   |
| 63 | 95.048  | <b>C<sub>6</sub>H<sub>6</sub>O</b>             | Phenol                                                        |   | 0.097<br>(0.057)                                                                  | 0.418<br>(0.352) | Trimodal pattern in monsoon while bimodal pattern with morning and evening peaks in post-monsoon |                   |
| 64 | 97.027  | <b>C<sub>5</sub>H<sub>4</sub>O<sub>2</sub></b> | Furfural                                                      |  | 0.048<br>(0.036)                                                                  | 0.355<br>(0.294) | Bimodal pattern with morning and evening peaks                                                   |                   |
| 65 | 97.063  | <b>C<sub>6</sub>H<sub>8</sub>O</b>             | C2 substituted furan, 2-methyl-2-Cyclopenten-1-one            |  | 0.034<br>(0.016)                                                                  | 0.132<br>(0.098) | Bimodal pattern with morning and evening peaks                                                   |                   |
| 66 | 99.043  | <b>C<sub>5</sub>H<sub>6</sub>O<sub>2</sub></b> | Furfuryl alcohol, 3-Methyl-2-furanone 4-Methyl-5H-furan-2-one |   | 0.081<br>(0.059)                                                                  | 0.267<br>(0.251) | Unimodal pattern with afternoon peak                                                             |                   |
| 67 | 99.079  | <b>C<sub>6</sub>H<sub>10</sub>O</b>            | Cyclohexanone                                                 |   | 0.167<br>(0.109)                                                                  | 0.424<br>(0.346) | Bimodal pattern with afternoon and evening peaks                                                 |                   |
| 68 | 101.059 | <b>C<sub>5</sub>H<sub>8</sub>O<sub>2</sub></b> | 2,3-Pentanedione,<br>methyl methacrylate &                    |   | 0.129<br>(0.074)                                                                  | 0.304<br>(0.268) | Bimodal pattern with afternoon and evening peaks                                                 |                   |

|    |         |                                                 |                                                                        |                                                                                      |                  |                  |                                                                                                 |  |
|----|---------|-------------------------------------------------|------------------------------------------------------------------------|--------------------------------------------------------------------------------------|------------------|------------------|-------------------------------------------------------------------------------------------------|--|
|    |         |                                                 |                                                                        | other hydrocarbons                                                                   |                  |                  |                                                                                                 |  |
| 69 | 107.049 | <b>C<sub>7</sub>H<sub>6</sub>O</b>              | Benzaldehyde                                                           | 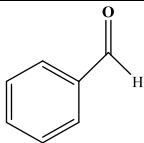   | 0.06<br>(0.046)  | 0.202<br>(0.19)  | Bimodal pattern with afternoon and evening peaks                                                |  |
| 70 | 109.064 | <b>C<sub>7</sub>H<sub>8</sub>O</b>              | Methylphenol isomers, Anisole                                          |    | 0.027<br>(0.016) | 0.1<br>(0.078)   | Bimodal pattern with morning and evening peaks                                                  |  |
| 71 | 111.042 | <b>C<sub>6</sub>H<sub>6</sub>O<sub>2</sub></b>  | 5-Methylfurfural, Hydroxyphenol                                        |    | 0.015 (0.01)     | 0.097<br>(0.083) | Trimodal pattern in monsoon while Bimodal pattern with morning and evening peak in post-monsoon |  |
| 72 | 111.08  | <b>C<sub>7</sub>H<sub>10</sub>O</b>             | C3-substituted furans, C2-substituted cyclopentene, methyl cyclohexene |    | 0.021<br>(0.011) | 0.081<br>(0.068) | Bimodal pattern with morning and evening peaks                                                  |  |
| 73 | 113.059 | <b>C<sub>6</sub>H<sub>8</sub>O<sub>2</sub></b>  | Dimethylbutenedial / C4-substituted aldehyde                           |  | 0.047<br>(0.027) | 0.159<br>(0.143) | Bimodal pattern with morning and evening peaks                                                  |  |
| 74 | 115.039 | <b>C<sub>5</sub>H<sub>6</sub>O<sub>3</sub></b>  | 5-Hydroxymethyl-2-furanone/ methylepoxybutanedial                      |  | 0.014<br>(0.01)  | 0.046<br>(0.046) | Unimodal pattern with afternoon peak                                                            |  |
| 75 | 115.075 | <b>C<sub>6</sub>H<sub>10</sub>O<sub>2</sub></b> | C6 diketone isomers/ C6 esters                                         |  | 0.051<br>(0.028) | 0.124<br>(0.121) | Unimodal pattern with afternoon peak                                                            |  |
| 76 | 121.064 | <b>C<sub>8</sub>H<sub>8</sub>O</b>              | Tolualdehyde                                                           |  | 0.065<br>(0.046) | 0.209<br>(0.195) | Bimodal pattern with afternoon and evening peaks                                                |  |
| 77 | 123.044 | <b>C<sub>7</sub>H<sub>6</sub>O<sub>2</sub></b>  | 2-Hydroxybenzaldehyde                                                  |  | 0.027<br>(0.017) | 0.119<br>(0.104) | Unimodal pattern with afternoon peak                                                            |  |
| 78 | 123.08  | <b>C<sub>8</sub>H<sub>10</sub>O</b>             | C2-substituted phenol, methyl anisole                                  |  | 0.015<br>(0.008) | 0.054<br>(0.046) | Bimodal pattern with morning and evening peaks                                                  |  |
| 79 | 125.06  | <b>C<sub>7</sub>H<sub>8</sub>O<sub>2</sub></b>  | Guaiacol                                                               |  | 0.016<br>(0.009) | 0.06<br>(0.049)  | Bimodal pattern with afternoon and evening peaks                                                |  |



|    |  |         |                                                 |                                         |                                                                                      |                  |                  |                                                                                                                       |
|----|--|---------|-------------------------------------------------|-----------------------------------------|--------------------------------------------------------------------------------------|------------------|------------------|-----------------------------------------------------------------------------------------------------------------------|
| 80 |  | 127.039 | <b>C<sub>6</sub>H<sub>6</sub>O<sub>3</sub></b>  | Hydroxymethyl furfural                  |    | 0.009<br>(0.006) | 0.044<br>(0.039) | Unimodal pattern with afternoon peak                                                                                  |
| 81 |  | 127.075 | <b>C<sub>7</sub>H<sub>10</sub>O<sub>2</sub></b> | Trimethylbutenedial / Methyl sorbate    |    | 0.025<br>(0.013) | 0.077<br>(0.07)  | Unimodal pattern with afternoon peak                                                                                  |
| 82 |  | 129.092 | <b>C<sub>7</sub>H<sub>12</sub>O<sub>2</sub></b> | C7-diketone/heptane-2,6-dione           |    | 0.025<br>(0.016) | 0.051<br>(0.049) | Unimodal pattern with afternoon peak                                                                                  |
| 83 |  | 133.065 | <b>C<sub>9</sub>H<sub>8</sub>O</b>              | Methyl benzofuran                       |    | 0.007<br>(0.003) | 0.027<br>(0.023) | Bimodal pattern with morning and evening peaks                                                                        |
| 84 |  | 135.08  | <b>C<sub>9</sub>H<sub>10</sub>O</b>             | 3-Methylacetophenone                    |    | 0.016 (0.01)     | 0.058<br>(0.054) | Bimodal pattern with morning and evening peaks                                                                        |
| 85 |  | 143.108 | <b>C<sub>8</sub>H<sub>14</sub>O<sub>2</sub></b> | 2,3-Octanedione                         |    | 0.02 (0.011)     | 0.04<br>(0.035)  | Unimodal pattern with afternoon peak                                                                                  |
| 86 |  | 145.051 | <b>C<sub>6</sub>H<sub>8</sub>O<sub>4</sub></b>  | Organic acids/levoglucosan fragment     |    | 0.006<br>(0.003) | 0.022<br>(0.018) | Unimodal pattern with afternoon peak                                                                                  |
| 87 |  | 145.123 | <b>C<sub>8</sub>H<sub>16</sub>O<sub>2</sub></b> | n-Octanoic acid                         |    | 0.009<br>(0.006) | 0.019<br>(0.014) | Unimodal pattern with afternoon peak in monsoon while bimodal pattern with afternoon and evening peak in post-monsoon |
| 88 |  | 149.024 | <b>C<sub>8</sub>H<sub>4</sub>O<sub>3</sub></b>  | Phthalic anhydride/ 2,3-Benzofurandione |   | 0.014<br>(0.011) | 0.062<br>(0.059) | Unimodal pattern with afternoon peak                                                                                  |
| 89 |  | 149.096 | <b>C<sub>10</sub>H<sub>12</sub>O</b>            | Methyl chavicol (estragole)             |  | 0.007<br>(0.004) | 0.03<br>(0.027)  | Bimodal pattern with morning and evening peaks                                                                        |
| 90 |  | 153.092 | <b>C<sub>9</sub>H<sub>12</sub>O<sub>2</sub></b> | Oxonopinone                             |  | 0.009<br>(0.004) | 0.029<br>(0.026) | Bimodal pattern with afternoon and evening peaks                                                                      |
| 91 |  | 153.128 | <b>C<sub>10</sub>H<sub>16</sub>O</b>            | Camphor pinene oxide                    |  | 0.022<br>(0.015) | 0.096<br>(0.086) | Bimodal pattern with afternoon and evening peaks                                                                      |
| 92 |  | 155.108 | <b>C<sub>9</sub>H<sub>14</sub>O<sub>2</sub></b> | Norpinonaldehyde                        |  | 0.012<br>(0.006) | 0.026<br>(0.022) | Unimodal pattern with afternoon peak                                                                                  |

|     |  |         |                                                  |                                                                    |                                                                                      |                  |                  |                                                                                                                                               |
|-----|--|---------|--------------------------------------------------|--------------------------------------------------------------------|--------------------------------------------------------------------------------------|------------------|------------------|-----------------------------------------------------------------------------------------------------------------------------------------------|
| 93  |  | 155.144 | <b>C<sub>10</sub>H<sub>18</sub>O</b>             | Cineole,<br>Linalool, 4-<br>tert-butyl<br>cyclohexanone            | 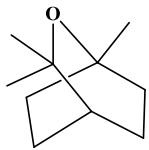   | 0.01 (0.007)     | 0.023<br>(0.019) | Unimodal<br>pattern with<br>afternoon peak<br>in monsoon<br>while bimodal<br>pattern with<br>afternoon and<br>evening peak in<br>post-monsoon |
| 94  |  | 157.122 | <b>C<sub>9</sub>H<sub>16</sub>O<sub>2</sub></b>  | C9- ester                                                          |    | 0.013<br>(0.007) | 0.026<br>(0.023) | Unimodal<br>pattern with<br>afternoon peak                                                                                                    |
| 95  |  | 159.14  | <b>C<sub>9</sub>H<sub>18</sub>O<sub>2</sub></b>  | C9-organic<br>acid                                                 |    | 0.007<br>(0.005) | 0.013<br>(0.01)  | Unimodal<br>pattern with<br>afternoon peak                                                                                                    |
| 96  |  | 177.056 | <b>C<sub>10</sub>H<sub>8</sub>O<sub>3</sub></b>  | 2-<br>Formylcinnami<br>c acid /<br>hydroxy-<br>methyl-<br>coumarin |    | 0.008<br>(0.005) | 0.026<br>(0.022) | Bimodal pattern<br>with afternoon<br>and evening<br>peaks                                                                                     |
| 97  |  | 185.121 | <b>C<sub>10</sub>H<sub>16</sub>O<sub>3</sub></b> | cis-Pinonic<br>acid                                                |   | 0.006<br>(0.004) | 0.01<br>(0.008)  | Unimodal<br>pattern with<br>afternoon peak                                                                                                    |
| 98  |  | 195.138 | <b>C<sub>12</sub>H<sub>18</sub>O<sub>2</sub></b> | Myrtenyl<br>acetate                                                |  | 0.002<br>(0.001) | 0.006<br>(0.006) | Unimodal<br>pattern with<br>afternoon peak                                                                                                    |
| 99  |  | 42.03   | <b>C<sub>2</sub>H<sub>3</sub>N</b>               | Acetonitrile                                                       |  | 0.291<br>(0.126) | 0.942<br>(0.714) | Bimodal pattern<br>with morning<br>and evening<br>peaks                                                                                       |
| 100 |  | 44.018  | <b>HNCO</b>                                      | Isocyanic acid                                                     | $\text{HN}=\text{C}=\text{O}$                                                        | 0.051<br>(0.038) | 0.139<br>(0.095) | Bimodal pattern<br>with morning<br>and afternoon<br>peaks                                                                                     |
| 101 |  | 46.025  | <b>CH<sub>4</sub>NO</b>                          | Formamide                                                          |  | 0.232<br>(0.206) | 0.296<br>(0.236) | Unimodal<br>pattern with<br>afternoon peak                                                                                                    |
| 102 |  | 48.048  | <b>CH<sub>5</sub>NO</b>                          | methoxyamine                                                       |  | 0.003<br>(0.002) | 0.01<br>(0.009)  | Bimodal pattern<br>with morning<br>and evening<br>peaks                                                                                       |
| 103 |  | 76.037  | <b>C<sub>2</sub>H<sub>5</sub>NO<sub>2</sub></b>  | Nitroethane                                                        |  | 0.009<br>(0.005) | 0.213<br>(0.206) | Unimodal<br>pattern with<br>afternoon peak                                                                                                    |
| 104 |  | 84.08   | <b>C<sub>5</sub>H<sub>9</sub>N</b>               | Pentanenitrile/<br>Methylbutanen<br>itrile isomers/<br>C5-amines   |  | 0.005<br>(0.003) | 0.021<br>(0.022) | Bimodal pattern<br>with morning<br>and evening<br>peaks                                                                                       |

|     |            |         |                                                 |                                                     |                                                                                     |                  |                  |                                                  |
|-----|------------|---------|-------------------------------------------------|-----------------------------------------------------|-------------------------------------------------------------------------------------|------------------|------------------|--------------------------------------------------|
| 105 |            | 116.108 | <b>C<sub>6</sub>H<sub>13</sub>NO</b>            | C6-amide                                            | 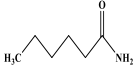   | 0.006<br>(0.004) | 0.01<br>(0.007)  | Unimodal pattern with afternoon peak             |
| 106 |            | 124.039 | <b>C<sub>6</sub>H<sub>5</sub>NO<sub>2</sub></b> | Nitrobenzene                                        |    | 0.006<br>(0.004) | 0.019<br>(0.018) | Trimodal pattern                                 |
| 107 |            | 138.056 | <b>C<sub>7</sub>H<sub>7</sub>NO<sub>2</sub></b> | Nitrotoluene/<br>salicylamide                       |    | 0.003<br>(0.001) | 0.013<br>(0.01)  | Trimodal pattern                                 |
| 108 |            | 154.052 | <b>C<sub>7</sub>H<sub>7</sub>NO<sub>3</sub></b> | Nitrobenzyl alcohol/Nitroresols, methyl-nitrophenol |    | 0.005<br>(0.004) | 0.024<br>(0.025) | Trimodal pattern                                 |
| 109 | CIVOC<br>S | 62.997  | <b>C<sub>2</sub>H<sub>3</sub>Cl</b>             | Vinyl chloride                                      |    | 0.004<br>(0.003) | 0.015<br>(0.011) | Bimodal pattern with afternoon and evening peaks |
| 110 |            | 146.977 | <b>C<sub>6</sub>H<sub>4</sub>Cl<sub>2</sub></b> | Dichlorobenzene                                     |    | 0.025<br>(0.021) | 0.115<br>(0.121) | Bimodal pattern with morning and evening peaks   |
| 111 | SVOC<br>S  | 49.007  | <b>CH<sub>4</sub>S</b>                          | Methanethiol                                        |  | 0.048<br>(0.047) | 0.128<br>(0.129) | Bimodal pattern with morning and evening peaks   |

- Bold ones in structure column are those compounds whose isotopic peaks were observed

**Figure S1** Example of mass spectra and peak assignment using IDA software which also illustrate the high mass resolving power of the PTR-ToF-MS 10K enabling separation of ion signals that land at the same nominal masses.

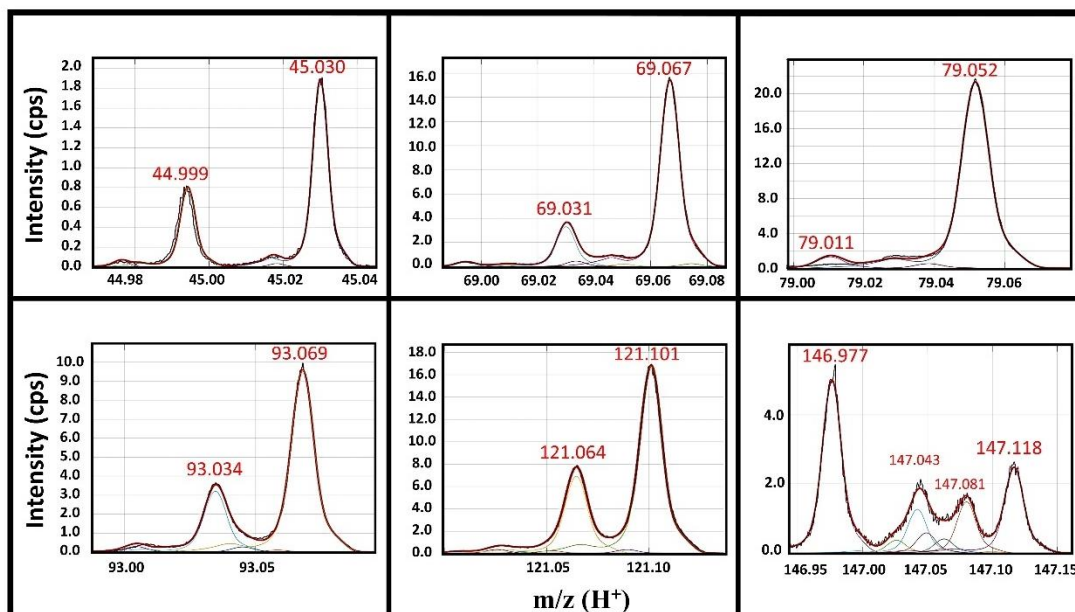

**Figure S2:** Transmission values as a function of  $m/z$  for the PTR-TOF-MS 10K obtained during a calibration experiment performed on 26<sup>th</sup> September 2022 using the VOC calibration gas mixture (Societa Italiana Acetilene E Derviat; S.I.A.D. S.p.A., Italy) containing 11 hydrocarbons at ~100 ppb, namely methanol, acetonitrile, acetone, isoprene, benzene, toluene, xylene, trimethylbenzene, and dichlorobenzene and trichlorobenzene

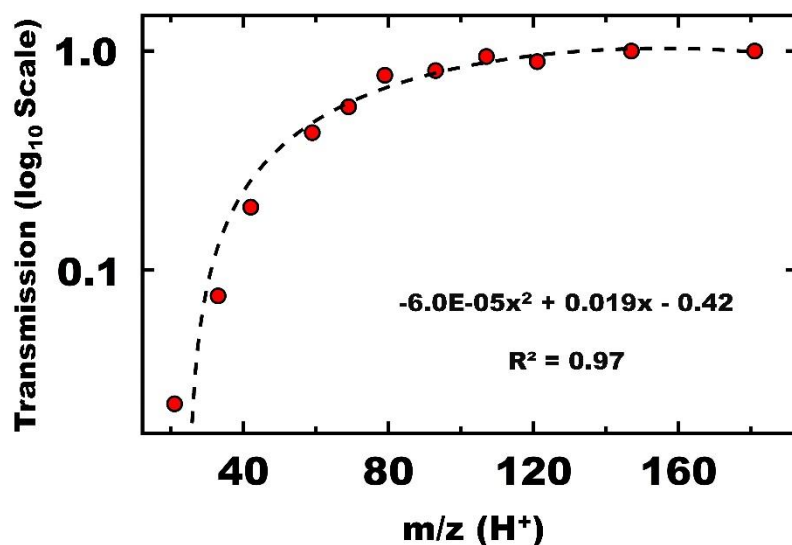

$$[R]_{ppb} = 10^9 \times \frac{\mu_0 U_{drift}}{L^2 k_{VOC+H_3O^+}} \times \frac{P_0^2}{P_{drift}^2} \times \frac{T_{drift}^2}{T_0^2} \times \frac{22400}{N_A} \times \frac{I_{(RH^+)}}{I_{(H_3O^+)}} \times \frac{T_{H_3O^+}}{T_{VOCH^+}} \quad \text{Equation S1}$$

Where  $k_{VOC+H_3O^+}$  = Rate constant of proton transfer from hydronium ion to a VOC

L = Length of drift tube (9.2 cm)

$\mu_0$  = Reduced mobility of  $H_3O^+$  ions ( $2.8 \text{ cm}^2 \text{ V}^{-1} \text{ s}^{-1}$ )

N = Number density of gases in the drift tube

E = Electric field across the drift tube

$U_{drift}$  = Voltage across the drift tube

$P_{drift}$  &  $T_{drift}$  = Drift tube pressure and temperature

$P_0$  &  $T_0$  = Standard pressure and temperature

$N_A$  = Avogadro Number

$\frac{T_{VOCH^+}}{T_{H_3O^+}}$  = Ratio of transmission efficiency of protonated VOC ions and hydronium ions

**Figure S3** Sensitivity (ncps/ppb) and linearity of selected VOCs in the calibration experiment (PTR-MS) performed on 26/09/2022. The horizontal error bars represent the root mean square propagation of errors due to 10% uncertainty in the VOC standard and 2% error for each of the two mass flow

controllers used for calibration. The vertical error bars represent the standard deviation ( $\sigma$ ) instrumental precision error while sampling the standard gas at each dilution mixing ratio.

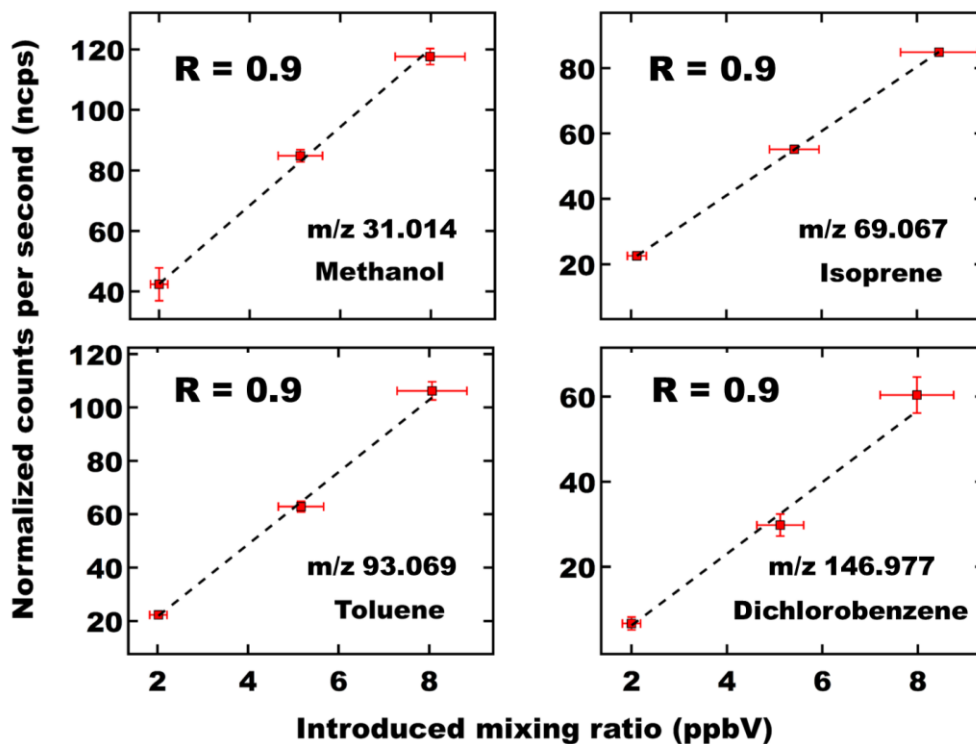

Supplement: Supplementary file 1 [file egusphere-2024-500-supplement.pdf]
